# Supplementary material
Source: PubMed Central journal article supplement (PMC4314223)
Supplement: supp_fj.14-259564_Supplemental_Figure1.pdf [file supp_fj.14-259564_Supplemental_Figure1.pdf]

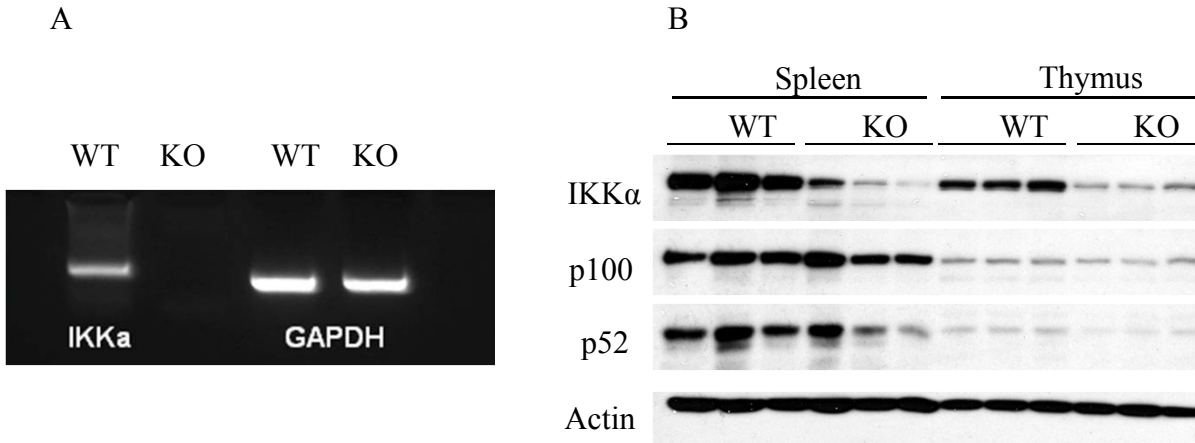

**Supplemental Fig 1. (A) RT-PCR analysis of IKK $\alpha$  expression.** CD4 cells isolated from LNs of WT or FCD4 mice were purified by negative selection using Dynalbeads (Invitrogen), and total RNA extracted. cDNA was generated and expression of IKK $\alpha$  was assessed using primers; 5'-ACTGAGTGACATAGGATCTGGGATCC-3' AND 5'-TCCACAGTGGCTGTGTACGGC-3'. **(B) Western blot analysis of expression of IKK $\alpha$ , p100 and p52.** CD4 cells were isolated from spleen and thymus of WT and KO mice with MACS. The cell lysates (5  $\mu$ g) were applied to an acrylamide gel and transferred to the PVDF membranes. The levels of protein expression were assessed by using specific antibodies: IKK $\alpha$  (IMG-136A) from IMGENEX, San Diego, CA; p100/p52 (4882) from Cell Signaling Technology, Inc. Danvers, MA; actin (A-5441) from Sigma, St. Louis, MO. The membranes were probed with horseradish peroxidase-conjugated secondary antibodies (Santa Cruz Biotechnology, Inc., Santa Cruz, CA).
