# Supplementary material
Source: PubMed Central journal article supplement (PMC4314223)
Supplement: supp_fj.14-259564_Supplemental_Figure2.pdf [file supp_fj.14-259564_Supplemental_Figure2.pdf]

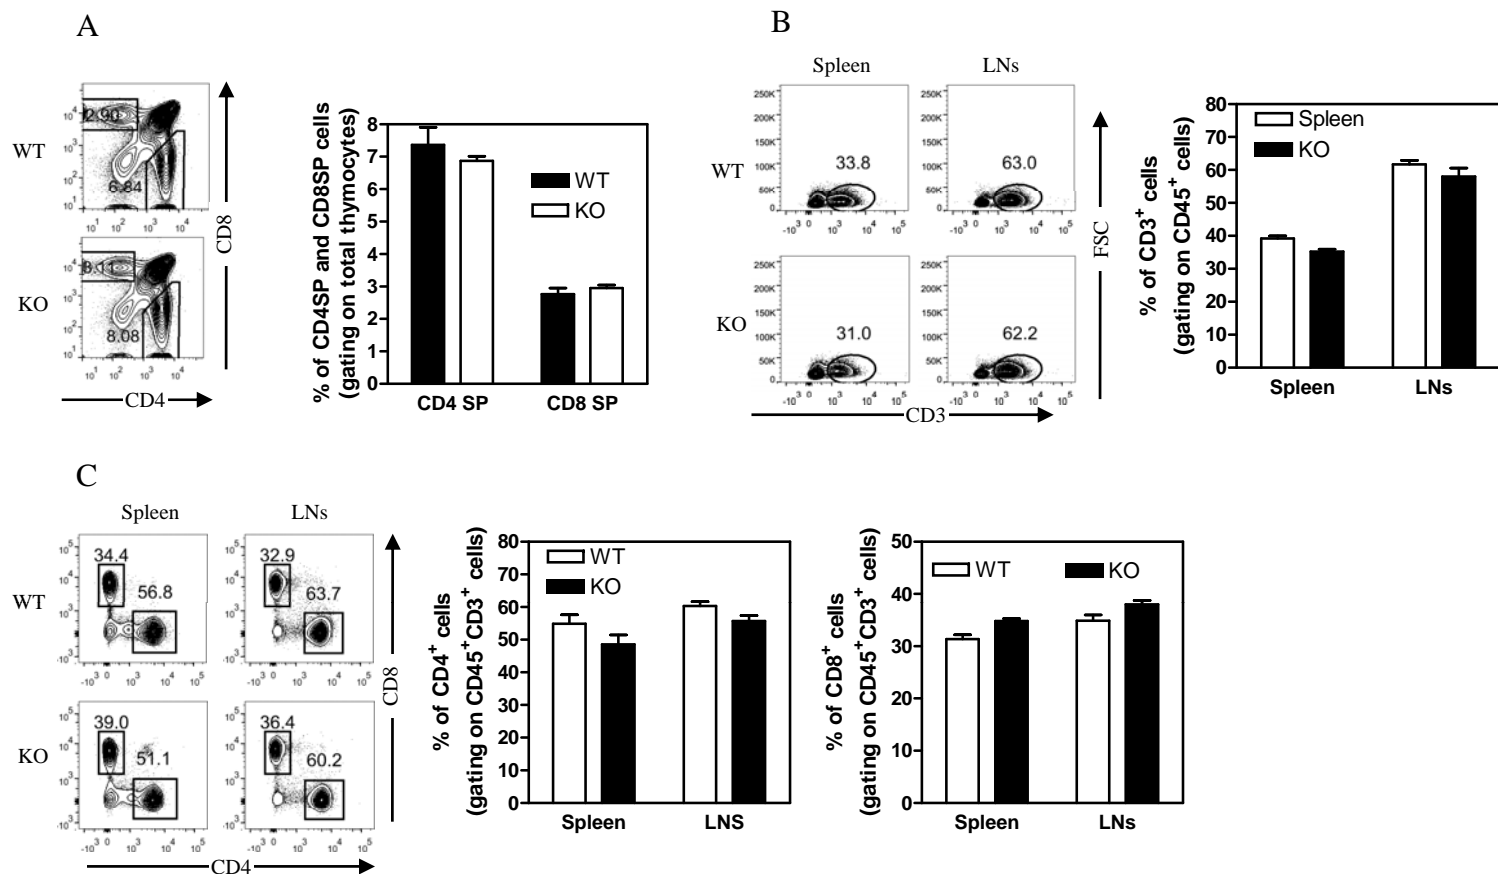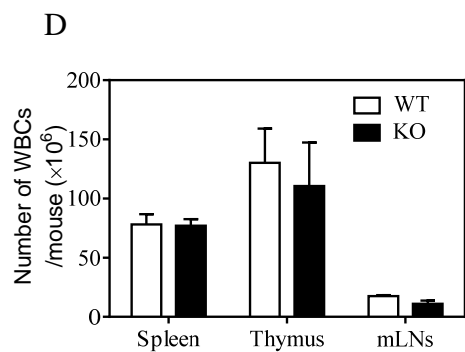

**Supplemental Fig 2. Proportion of CD4<sup>+</sup> and CD8<sup>+</sup> T cells in the lymphoid tissues of KO mice.** Cells from thymus, spleen and LNs of WT mice and KO mice were stained with CD3, CD4 and CD8 Abs and were analyzed by FACS. (A) Proportion of CD4<sup>+</sup>CD8<sup>-</sup> and CD8<sup>+</sup>CD4<sup>-</sup> cells in the thymocytes. (B) Proportion of CD3<sup>+</sup> cells in splenic and LN cells. (C) Proportion of CD4<sup>+</sup> and CD8<sup>+</sup> cells in splenic and LN cells. (D) Number of total WBCs in the spleen, thymus and mesenteric LNs (mLNs) of WT and KO mice. Typical FACS analysis was shown on the left and the summary (means±SEM, N=3) was shown on the right. Number in the FACS data indicates the proportion of gated cells. Data shown are representatives of three separate experiments with similar results.
