# Supplementary material
Source: PubMed Central journal article supplement (PMC4314223)
Supplement: supp_fj.14-259564_Supplemental_Figure3.pdf [file supp_fj.14-259564_Supplemental_Figure3.pdf]

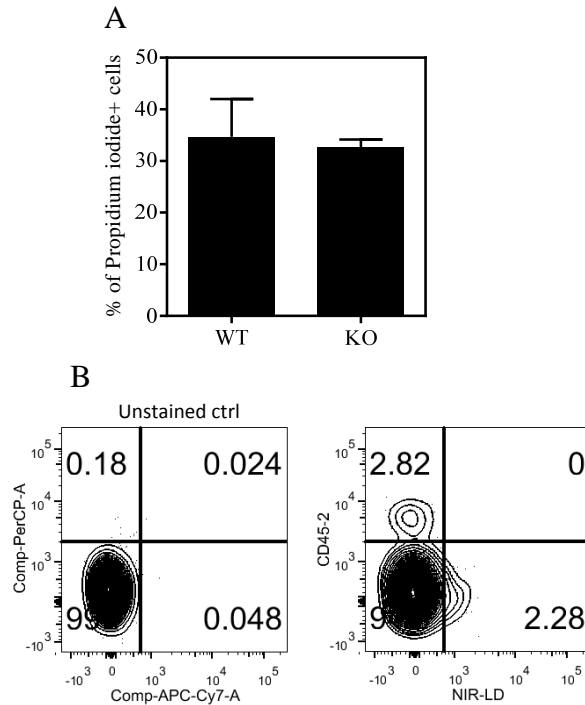

**Supplemental Fig 3. Viability of WT and KO cells in vitro and in vivo.** (A) MACS-purified WT and KO CD4 cells were stimulated with plate-bound anti-CD3 Ab (5  $\mu$ g/ml) and soluble anti-CD28 Ab (2  $\mu$ g/ml). After 24 hours, the cells were stained with PI (propidium iodide). The cell death, as indicated by the PI<sup>+</sup> staining, was analyzed by FACS. Data shown are summary of two separate experiments (Means $\pm$ SD, N=6). (2) MACS-purified WT and KO CD4 cells were mixed at a ratio of 1:1, and then were transferred into Rag 1<sup>-/-</sup> mice ( $2 \times 10^6$  cells). After 4 wks, the CD4 T cells present in the peripheral blood of recipient mice were harvested and analyzed. The cell death, as indicated by positive of LIVE/DEAD® Fixable Near-IR Stain, was analyzed by FACS, gating on CD45<sup>+</sup>CD4<sup>+</sup>TCR $\beta$ <sup>+</sup> cells (KO cells were CD45.2<sup>+</sup>, and WT cells were CD45.2<sup>-</sup>). The data shown are representatives of two separate experiments with same results.
