# Supplementary material
Source: PubMed Central journal article supplement (PMC4314223)
Supplement: supp_fj.14-259564_Supplemental_Figure4.pdf [file supp_fj.14-259564_Supplemental_Figure4.pdf]

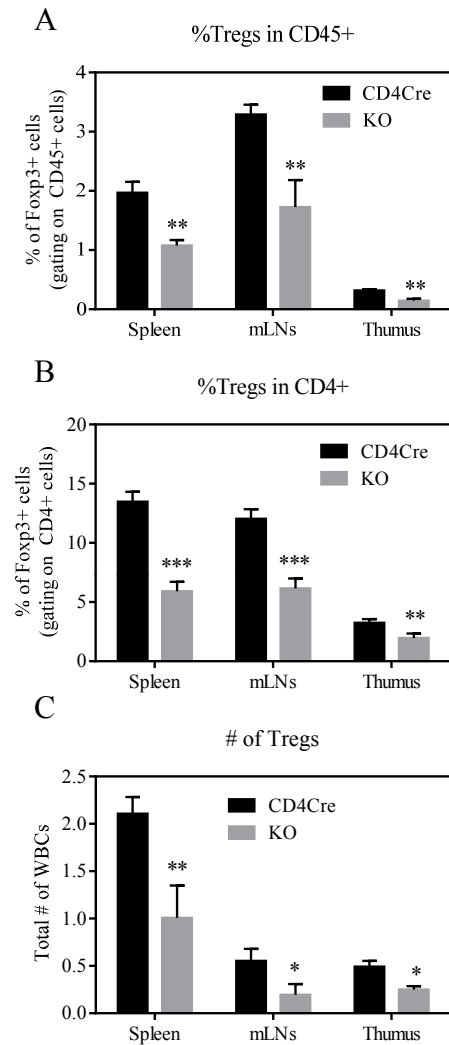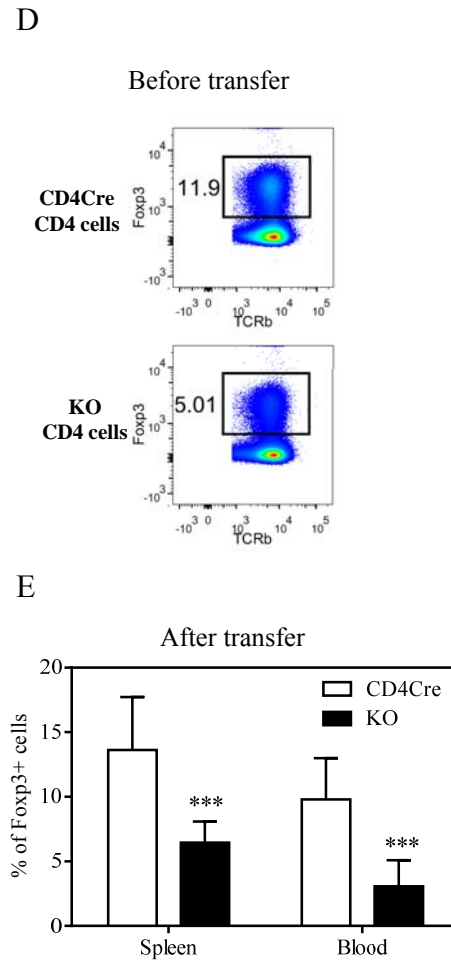

**Supplemental Fig 4. Proportion and number of Tregs was reduced in KO mice as compared with CD4Cre mice.** Cells from thymus, spleen and mesenteric LNs of CD4.Cre mice or KO mice were stained with CD45, CD3, CD4 and Foxp3 Abs and were analyzed by FACS. (A) Proportion of Foxp3+ cells in total CD45+ leukocytes; (B) Proportion of Foxp3+ cells in total CD4+ T cells. (C) absolute number of Foxp3+ cells in the spleen, mLN and thymus. (D) Proportion of Foxp3+ cells in MACS purified CD4 cells from CD4.Cre mice or KO mice (before transfer). (E) Proportion of Foxp3+ cells in the transferred CD4 T cells (CD45+TCR $\beta$ + cells) present in the spleen or in the blood of recipient Rag 1<sup>-/-</sup> mice (2 weeks after transfer). Comparison with the respective CD4.Cre group, \*p<0.05, \*\* p<0.01, \*\*\* p<0.0001. Data shown in A-C and E are means $\pm$ SD (N=3-4).
